# Supplementary material
Source: PubMed Central journal article supplement (PMC5890335)
Supplement: NIHMS931502-supplement-1.pdf [file NIHMS931502-supplement-1.pdf]

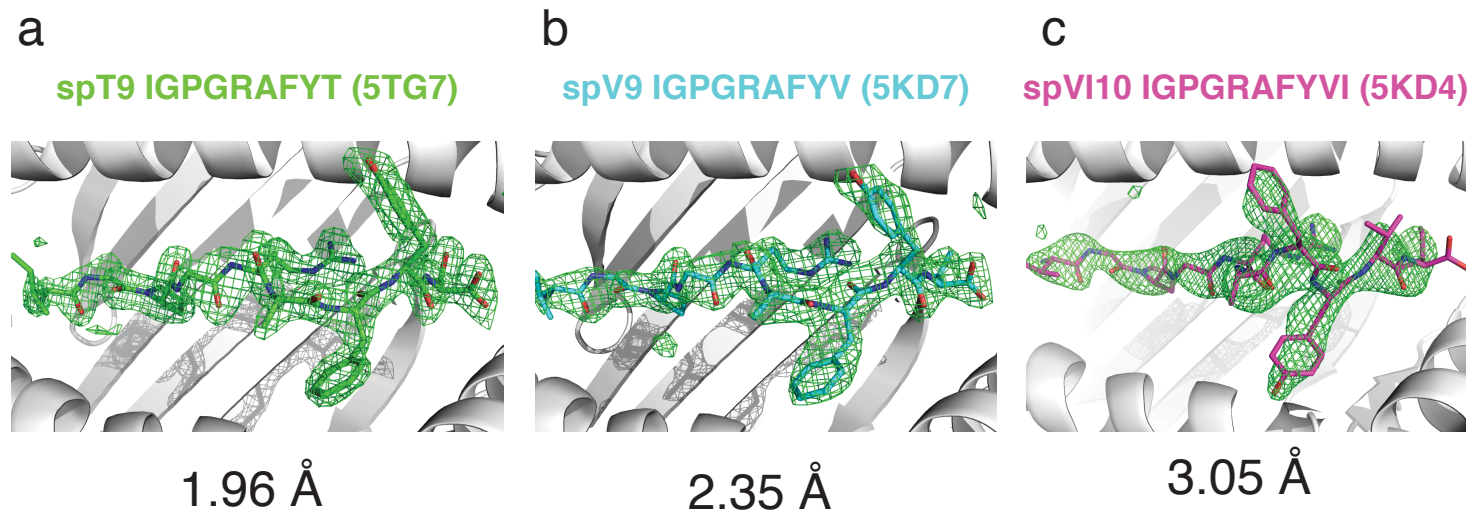

Figure S1. SA-omit maps reveal peptide electron density in pH2-D<sup>d</sup> structures. SA-omit maps were calculated for each of the indicated three structures (s.p.T9 (green), s.p.V9 (cyan), and s.p.VI10 (magenta)), and contoured at  $3.0\sigma$ . Structures were determined as indicated in Materials and methods, and data collection and refinement are described in Table 1. Resolution of each structure is provided. H2-D<sup>d</sup> is illustrated as a ribbon cartoon, peptides illustrated as stick figures, using PyMOL.
